# Supplementary material for: Epigenetic Silencing of miR-33b Promotes Peritoneal Metastases of Ovarian Cancer by Modulating the TAK1/FASN/CPT1A/NF-κB Axis
Source: MDPI journal article supplement (doi:10.3390/cancers13194795), 2021-09-24
Supplement: s1 [file s1]

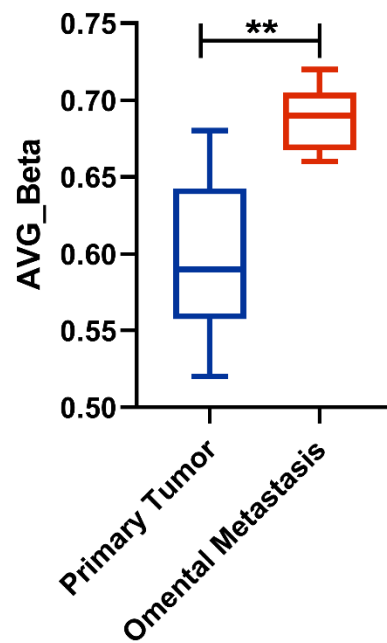

**Figure S1.** Boxplot comparing DMP methylation levels between primary and metastatic ovarian tumor tissues (N=6). The average DMP methylation levels were 0.597 and 0.688 in the primary and metastatic tumor groups, respectively. \*\*  $p < 0.01$ , student t test.

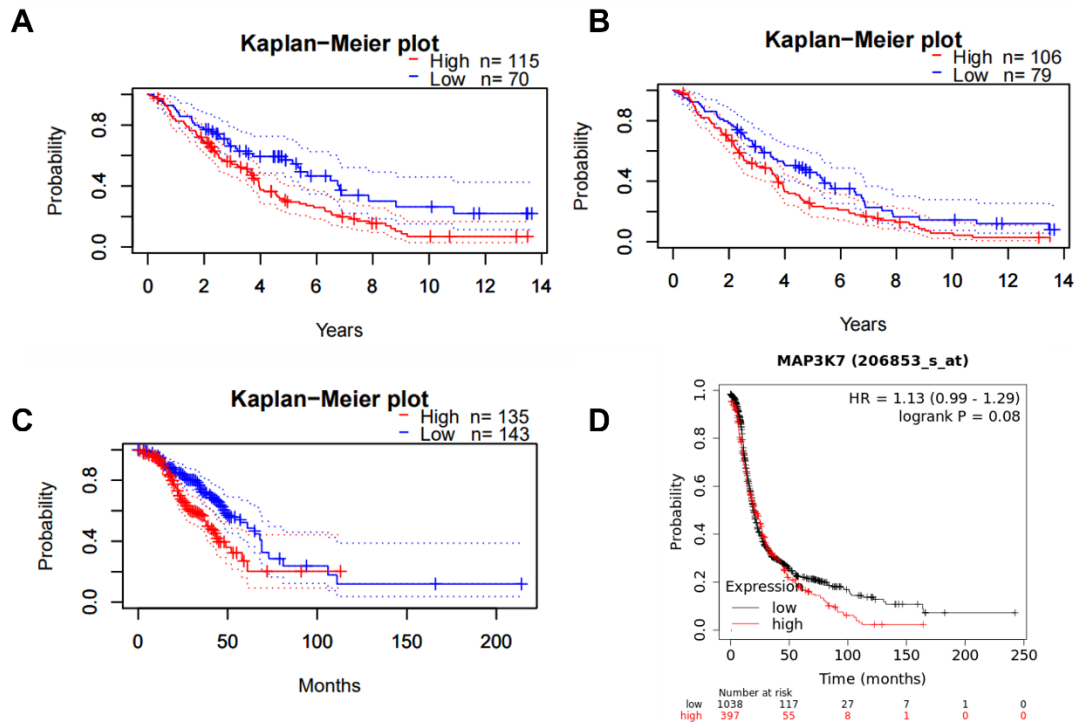

**Figure S2.** Prognostic value of TAK1 expression on survival rates in ovarian cancer using GEO and TCGA data. **(A,B)** The impact of TAK1 expression on **(A)** overall survival (HR=1.94, P=0.009) and **(B)** disease-free survival rate (HR=1.62, P=0.046) in a cohort of 185 ovarian cancer patients from GSE26712 dataset. **(C)** The impact of TAK1 expression on overall survival (HR=1.42, P=0.038) in a cohort of 278 ovarian cancer patients from GSE9891 dataset. **(D)** The impact of TAK1 expression on overall survival (HR=1.13, P=0.08) in a cohort of 1435 ovarian cancer patients from TCGA database.

**Table S1.** Primers for methylation analysis

| Analysis       | Sequence <sup>a</sup>                                                                                                                    |
|----------------|------------------------------------------------------------------------------------------------------------------------------------------|
| MSP            | F: 5'- TGTGTCGAATTTGTTCGTC -3'<br>R: 5'- ACGCCCAAAAAACGTAAA -3'                                                                          |
| USP            | F: 5'- AATTGTGTTGAATTTGTTTGTT -3'<br>R: 5'- ACACCCAAAAAACATAAACAC -3'                                                                    |
| Pyrosequencing | F: 5'- AGGTTGGATTTTTGATTTTTGATAGGTATA -3'<br>R: 5'- CCATTTTTCAAAAAAACATACTTATCT -3'<br>(With Biotin)<br>SQ: 5'-AGGTATATTATTATAGAGGGG -3' |

a: F=Forward primer; R=Reverse primer; SQ=Sequencing primer

**Table S2.** Kits and reagents used in this study.

| Kits/Assays                            | Companies                                         |
|----------------------------------------|---------------------------------------------------|
| Cleanascite™ Lipid Removal Reagent     | Biotech Support Group, Monmouth Junction, NJ, USA |
| Extracellular O2 Consumption Assay Kit | Abcam, Cambridge, MA, USA                         |
| Fatty Acid Oxidation Assay Kit         | Abcam, Cambridge, MA, USA                         |
| Luminescent ATP Detection Assay Kit    | Abcam, Cambridge, MA, USA                         |
| The Lipolysis Assay Kit (Colorimetric) | Abcam, Cambridge, MA, USA                         |
| Triglyceride Assay Kit                 | Abcam, Cambridge, MA, USA                         |
| Etomoxir (Cat. No. 4539)               | Tocris Bioscience, Minneapolis, MN, USA           |
| Orlistat (Cat. No. 3540)               | Tocris Bioscience, Minneapolis, MN, USA           |

**Table S3.** Antibodies used for Western blotting.

| <b>Antibodies</b>                                                              | <b>Company</b>                 | <b>Dilution</b> |
|--------------------------------------------------------------------------------|--------------------------------|-----------------|
| TAK1 (D94D7) mAb #5206                                                         | Cell Signaling Technology, USA | 1:1000          |
| Phospho-TAK1 (Ser412)<br>Antibody #9339                                        | Cell Signaling Technology, USA | 1:1000          |
| Phospho-I $\kappa$ B $\alpha$ (Ser32) (14D4)<br>mAb #2859                      | Cell Signaling Technology, USA | 1:1000          |
| I $\kappa$ B $\alpha$ (L35A5) mAb (Amino-terminal Antigen) #4814               | Cell Signaling Technology, USA | 1:1000          |
| Phospho-IKK $\alpha$ / $\beta$ (Ser176/180)<br>(16A6) mAb #2697                | Cell Signaling Technology, USA | 1:1000          |
| IKK $\beta$ (D30C6) mAb #8943                                                  | Cell Signaling Technology, USA | 1:1000          |
| IKK $\alpha$ (3G12) mAb #11930                                                 | Cell Signaling Technology, USA | 1:1000          |
| Fatty Acid Synthase (C20G5)<br>mAb                                             | Cell Signaling Technology, USA | 1:1000          |
| CPT1A (D3B3) mAb # 12252S                                                      | Cell Signaling Technology, USA | 1:1000          |
| GAPDH (D16H11) XP <sup>®</sup> mAb<br>#5174                                    | Cell Signaling Technology, USA | 1:1000          |
| IRDye <sup>®</sup> 680 RD/800 CW Goat<br>anti-Mouse IgG Secondary<br>Antibody  | LI-COR Biosciences, USA        | 1:15000         |
| IRDye <sup>®</sup> 680 RD/800 CW Goat<br>anti-Rabbit IgG Secondary<br>Antibody | LI-COR Biosciences, USA        | 1:15000         |
