# Supplementary figures and images for: Epigenetic Silencing of miR-33b Promotes Peritoneal Metastases of Ovarian Cancer by Modulating the TAK1/FASN/CPT1A/NF-κB Axis
Source: MDPI journal article supplement (doi:10.3390/cancers13194795), 2021-09-24

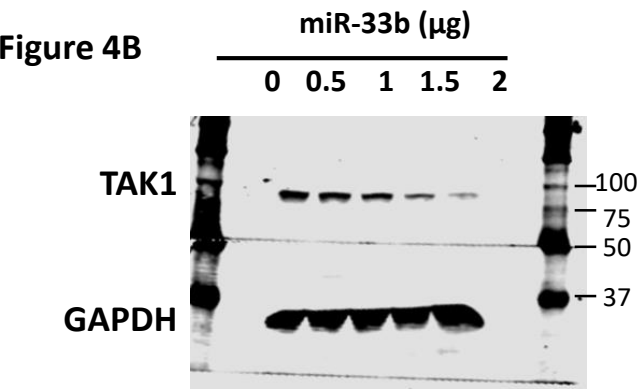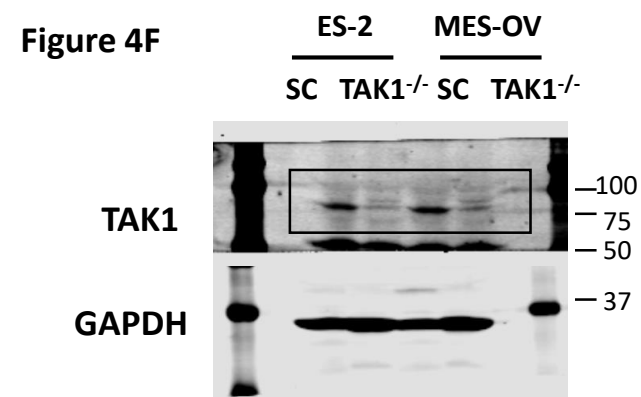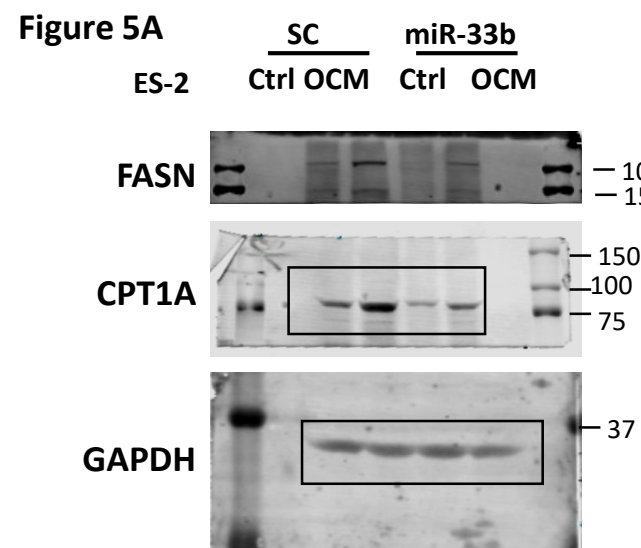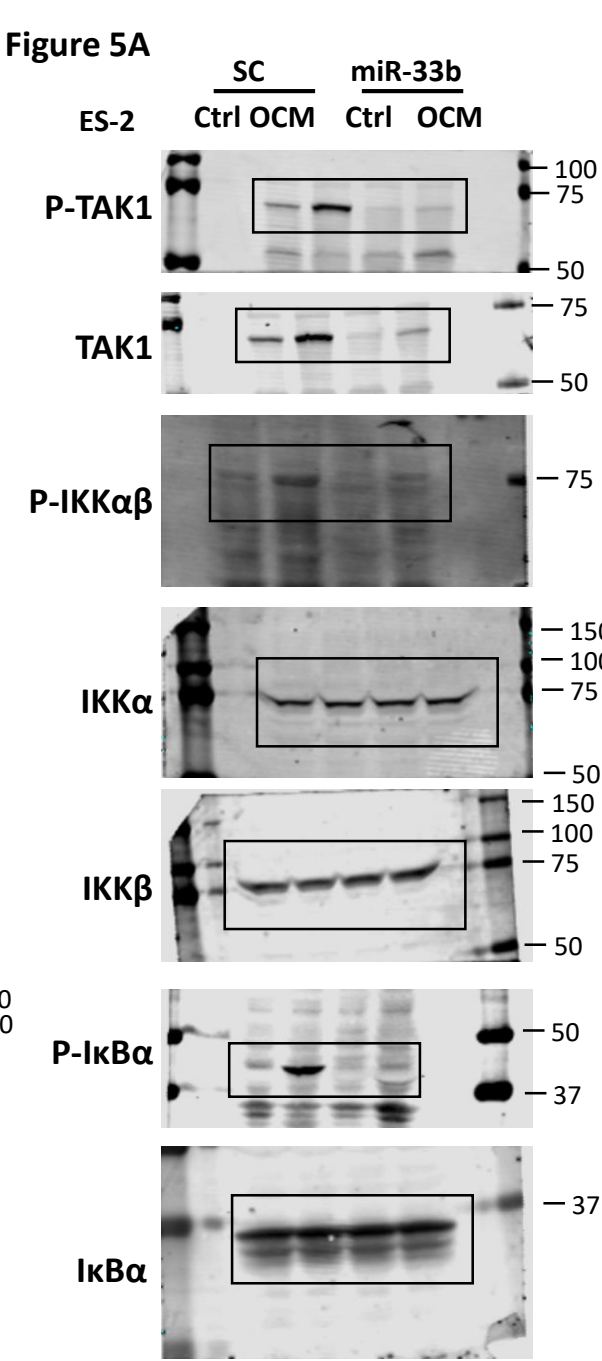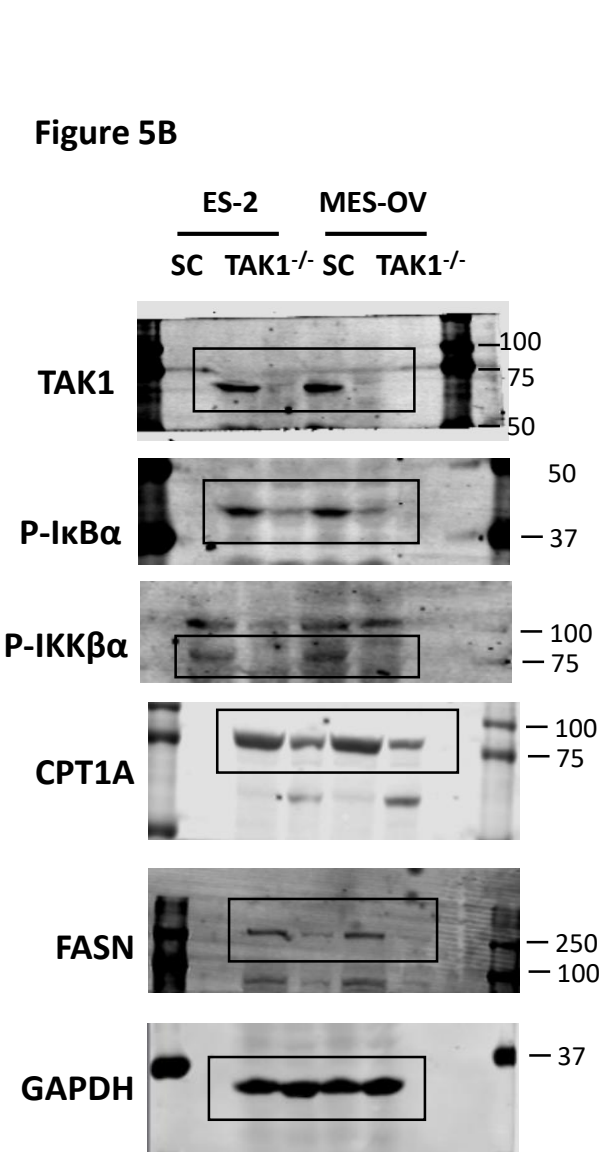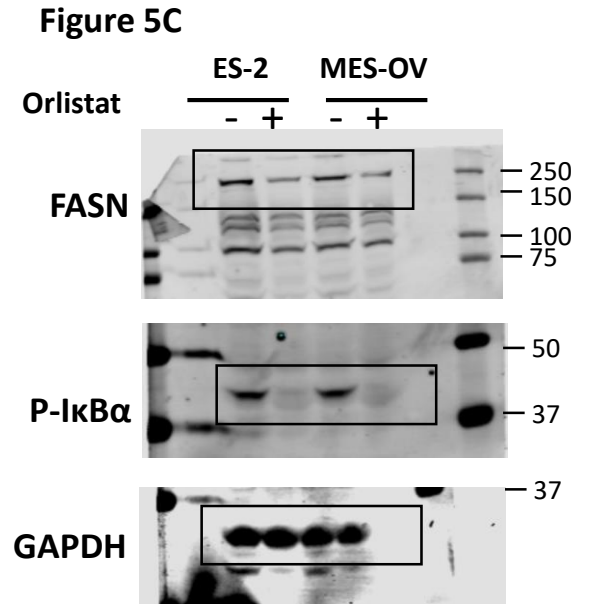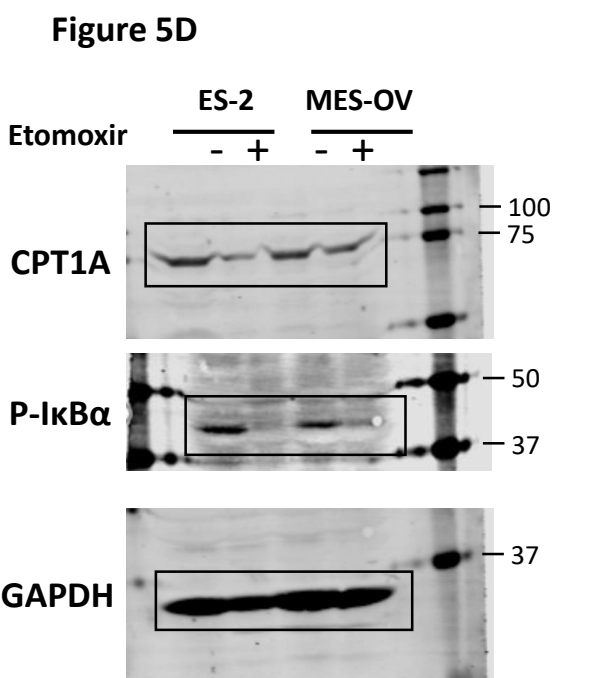

Supplement: s1 [file s1]
